# Supplementary material for: Genetic predisposition influences plasma lipids of participants on habitual diet, but not the response to reductions in dietary intake of saturated fatty acids
Source: PubMed Central journal article supplement (PMC3407860; doi:10.1016/j.atherosclerosis.2010.12.039), 2011-04
Supplement: mmc1.pdf [file mmc1.pdf]

# Supplementary figure 1

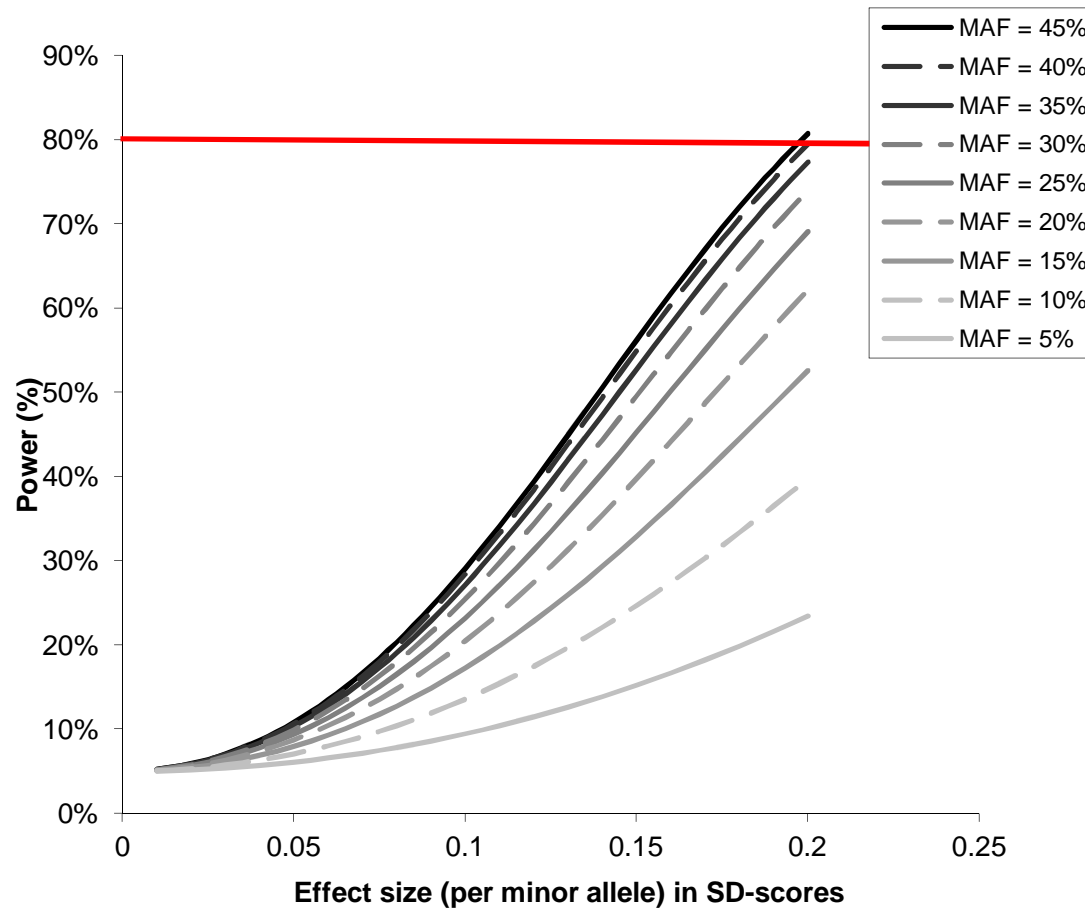

## Supplementary figure 1

The power to detect various levels of effect sizes for a range of minor allele frequencies. A range of effect sizes for the difference in trait per allele are expressed as SD-scores and the corresponding power was calculated using Quanto (Version 1.2.4). This calculation was performed for allele frequencies from 5-45%. The calculation was based on the size ( $n \sim 400$ ) of the White population in this study.
