# Supplementary material for: Genetic predisposition influences plasma lipids of participants on habitual diet, but not the response to reductions in dietary intake of saturated fatty acids
Source: PubMed Central journal article supplement (PMC3407860; doi:10.1016/j.atherosclerosis.2010.12.039), 2011-04
Supplement: mmc2.pdf [file mmc2.pdf]

## Supplementary figure 2

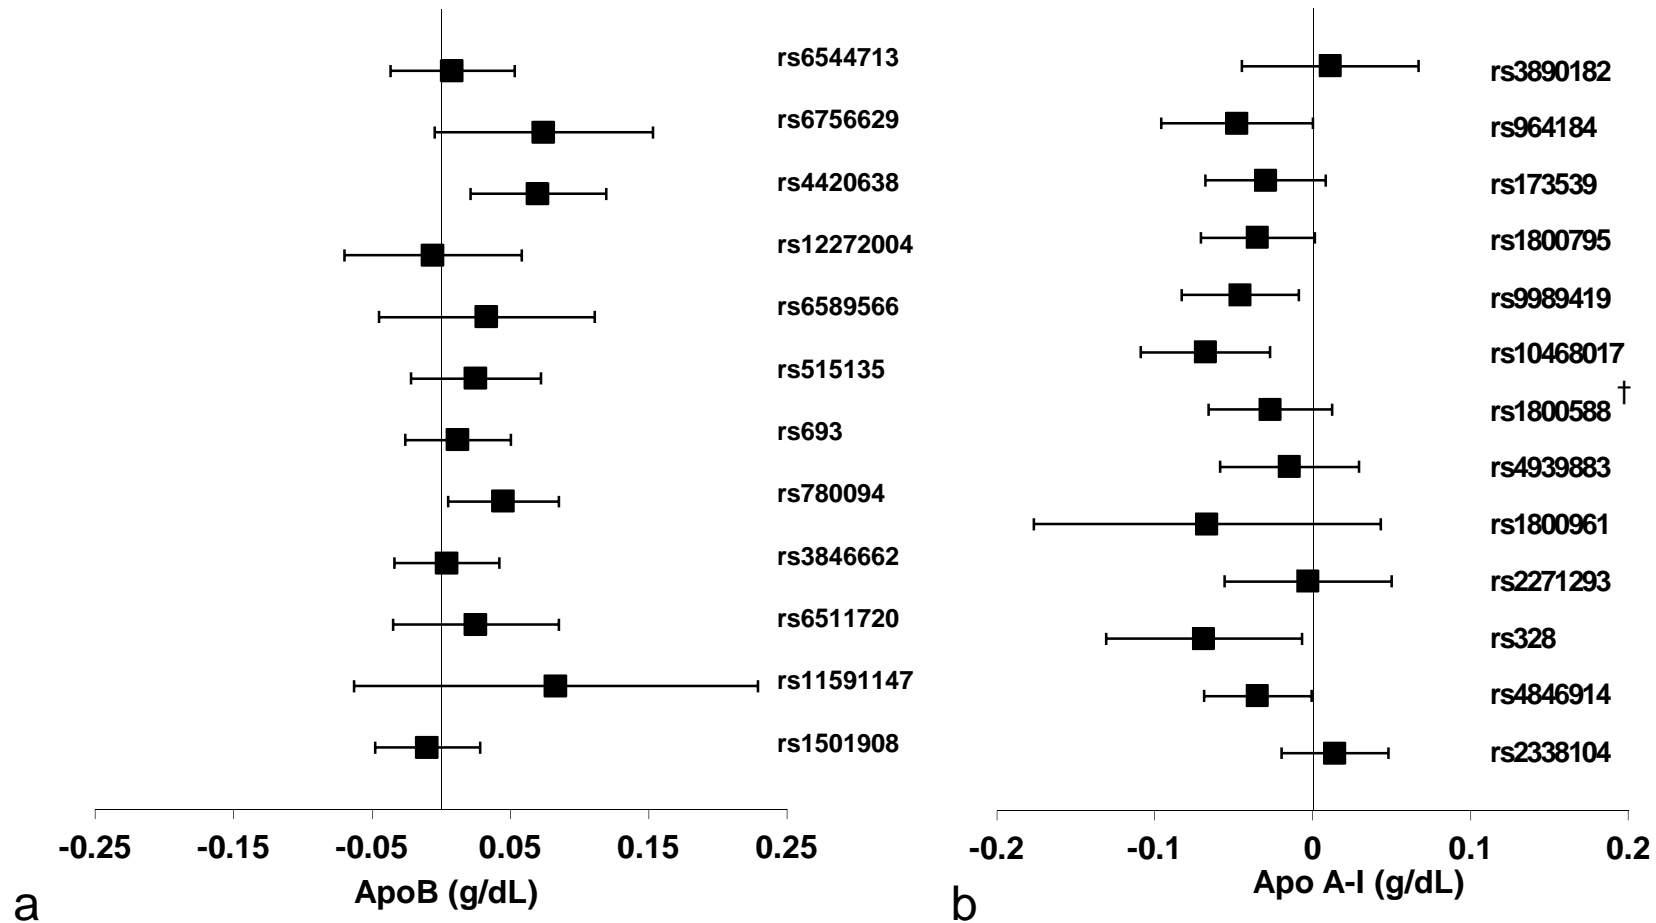

### Supplementary figure 2

The effect of LDL-C-associated SNPs on apo B (a) and HDL-C-associated SNPs on apo A-I (b) at baseline.

Data are presented as the effect size  $\pm$  95% CI from the meta-analysis of summary statistics from linear regression analyses performed in the three ethnicities between (a) individual LDL-C-SNPs and apo B and (b) individual HDL-C SNPs and apo A-I at baseline. The models were adjusted for age, gender and BMI.

<sup>†</sup> rs1800588 (LIPC) was significantly heterogeneous ( $P < 0.0001$ ) for the 3 ethnicities, the meta-analysed data for the White and Asian subgroups only (Heterogeneity = 0.256) are presented for this SNP.
