# Supplementary material for: Genetic predisposition influences plasma lipids of participants on habitual diet, but not the response to reductions in dietary intake of saturated fatty acids
Source: PubMed Central journal article supplement (PMC3407860; doi:10.1016/j.atherosclerosis.2010.12.039), 2011-04
Supplement: mmc4.pdf [file mmc4.pdf]

Supplementary Table 2

Association between individual risk SNPs and total, LDL and HDL cholesterol, triglyceride, apo A-I and apo B at baseline

|                                                         | Gene            | White  |      |         |     | S, SE Asian |      |      |    | Black-African |      |       |    | Meta-analysis |        |       |       |       |
|---------------------------------------------------------|-----------------|--------|------|---------|-----|-------------|------|------|----|---------------|------|-------|----|---------------|--------|-------|-------|-------|
|                                                         |                 | Effect | SE   | P       | n   | Effect      | SE   | P    | n  | Effect        | SE   | P     | n  | Heterogeneity | Effect | CI    | CI    | P     |
| <b>Association of TC SNPs with TC at baseline</b>       |                 |        |      |         |     |             |      |      |    |               |      |       |    |               |        |       |       |       |
| rs4939883                                               | LIPG            | 0.12   | 0.08 | 0.15    | 393 | 0.15        | 0.24 | 0.55 | 46 | 0.13          | 0.23 | 0.56  | 39 | 0.99          | 0.12   | -0.02 | 0.27  | 0.09  |
| rs6756629                                               | ABCG5           | 0.40   | 0.13 | 0.002   | 393 | 0.04        | 0.50 | 0.93 | 46 | 0.18          | 0.53 | 0.74  | 39 | 0.73          | 0.37   | 0.13  | 0.60  | 0.003 |
| rs12272004                                              | APO(A1/A4A5/C3) | 0.08   | 0.11 | 0.48    | 393 | 0.24        | 0.26 | 0.36 | 46 | -0.29         | 0.37 | 0.43  | 39 | 0.50          | 0.08   | -0.12 | 0.27  | 0.45  |
| rs693                                                   | APOB            | 0.09   | 0.07 | 0.18    | 392 | 0.22        | 0.21 | 0.30 | 46 | 0.03          | 0.21 | 0.89  | 39 | 0.79          | 0.10   | -0.02 | 0.21  | 0.12  |
| rs3846662                                               | HMGCR           | -0.04  | 0.07 | 0.58    | 381 | -0.11       | 0.23 | 0.62 | 41 | -0.20         | 0.20 | 0.33  | 37 | 0.72          | -0.06  | -0.18 | 0.06  | 0.35  |
| <b>Association of LDL-C SNPs with LDL-C at baseline</b> |                 |        |      |         |     |             |      |      |    |               |      |       |    |               |        |       |       |       |
| rs6544713                                               | ABCG8           | -0.06  | 0.06 | 0.38    | 392 | 0.19        | 0.21 | 0.38 | 46 | -0.04         | 0.25 | 0.86  | 39 | 0.55          | -0.04  | -0.15 | 0.08  | 0.54  |
| rs6756629                                               | ABCG5           | 0.33   | 0.11 | 0.003   | 391 | -0.03       | 0.44 | 0.94 | 46 | 0.23          | 0.47 | 0.62  | 39 | 0.71          | 0.31   | 0.10  | 0.51  | 0.003 |
| rs4420638                                               | APOE            | 0.22   | 0.07 | 0.003   | 384 | 0.15        | 0.19 | 0.45 | 46 | 0.06          | 0.30 | 0.84  | 39 | 0.82          | 0.21   | 0.07  | 0.34  | 0.002 |
| rs12272004                                              | APO(A1/A4A5/C3) | 0.05   | 0.09 | 0.57    | 391 | 0.08        | 0.23 | 0.74 | 46 | -0.34         | 0.33 | 0.30  | 39 | 0.50          | 0.03   | -0.14 | 0.20  | 0.72  |
| rs6589566                                               | APOA5           | -0.08  | 0.12 | 0.47    | 384 | 0.26        | 0.30 | 0.39 | 46 | -0.26         | 0.41 | 0.53  | 39 | 0.50          | -0.05  | -0.26 | 0.15  | 0.61  |
| rs515135                                                | APOB            | 0.10   | 0.07 | 0.16    | 390 | -0.20       | 0.22 | 0.37 | 45 | 0.42          | 0.25 | 0.10  | 39 | 0.18          | 0.09   | -0.03 | 0.22  | 0.14  |
| rs693                                                   | APOB            | 0.05   | 0.06 | 0.34    | 390 | 0.13        | 0.19 | 0.48 | 46 | 0.10          | 0.19 | 0.61  | 39 | 0.91          | 0.06   | -0.04 | 0.16  | 0.23  |
| rs780094                                                | GCKR            | 0.08   | 0.06 | 0.19    | 391 | 0.29        | 0.18 | 0.11 | 46 | 0.10          | 0.23 | 0.68  | 37 | 0.53          | 0.10   | -0.01 | 0.20  | 0.07  |
| rs3846662                                               | HMGCR           | -0.01  | 0.06 | 0.90    | 379 | -0.13       | 0.20 | 0.51 | 41 | -0.04         | 0.18 | 0.83  | 37 | 0.82          | -0.02  | -0.12 | 0.08  | 0.73  |
| rs6511720                                               | LDLR            | 0.08   | 0.09 | 0.35    | 389 | 0.18        | 0.26 | 0.50 | 46 | -0.01         | 0.29 | 0.96  | 39 | 0.89          | 0.08   | -0.07 | 0.24  | 0.30  |
| rs11591147                                              | PCSK9           | -0.11  | 0.30 | 0.71    | 392 | 0.48        | 0.36 | 0.19 | 46 | 0.43          | 0.45 | 0.35  | 39 | 0.38          | 0.19   | -0.21 | 0.60  | 0.35  |
| rs1501908                                               | TIMD4, HAVCR1   | 0.02   | 0.06 | 0.77    | 388 | 0.18        | 0.16 | 0.28 | 45 | 0.03          | 0.19 | 0.86  | 38 | 0.64          | 0.03   | -0.07 | 0.14  | 0.51  |
| <b>Association of HDL-C SNPs with HDL-C at baseline</b> |                 |        |      |         |     |             |      |      |    |               |      |       |    |               |        |       |       |       |
| rs3890182                                               | ABCA1           | 0.00   | 0.03 | 0.95    | 392 | -0.00       | 0.08 | 0.98 | 45 | 0.08          | 0.11 | 0.46  | 39 | 0.54          | 0.00   | -0.05 | 0.05  | 0.89  |
| rs964184                                                | APOA1-C3-A4-A5  | -0.03  | 0.03 | 0.21    | 394 | 0.00        | 0.08 | 0.97 | 44 | -0.11         | 0.09 | 0.21  | 38 | 0.61          | -0.04  | -0.08 | 0.01  | 0.13  |
| rs173539                                                | CETP            | -0.05  | 0.02 | 0.01    | 388 | -0.05       | 0.06 | 0.39 | 46 | -0.13         | 0.07 | 0.05  | 39 | 0.54          | -0.06  | -0.10 | -0.02 | 0.002 |
| rs1800775                                               | CETP            | -0.02  | 0.02 | 0.32    | 386 | -0.09       | 0.06 | 0.18 | 46 | -0.01         | 0.08 | 0.92  | 39 | 0.58          | -0.02  | -0.06 | 0.01  | 0.18  |
| rs9989419                                               | CETP            | -0.02  | 0.02 | 0.36    | 391 | -0.10       | 0.06 | 0.10 | 45 | -0.12         | 0.06 | 0.05  | 37 | 0.15          | -0.04  | -0.07 | 0     | 0.05  |
| rs10468017                                              | LIPC            | -0.06  | 0.02 | 0.005   | 385 | -0.06       | 0.07 | 0.39 | 46 | -0.05         | 0.08 | 0.56  | 39 | 0.98          | -0.06  | -0.10 | -0.02 | 0.003 |
| rs1800588                                               | LIPC            | -0.09  | 0.02 | <0.0001 | 392 | -0.15       | 0.06 | 0.01 | 46 | 0.23          | 0.06 | 0.001 | 39 | <0.0001       |        |       |       |       |
| rs4939883                                               | LIPG            | -0.01  | 0.02 | 0.77    | 393 | -0.05       | 0.08 | 0.56 | 46 | -0.10         | 0.07 | 0.16  | 39 | 0.44          | -0.02  | -0.06 | 0.02  | 0.38  |
| rs1800961                                               | HNF4A           | -0.07  | 0.06 | 0.23    | 392 | -0.16       | 0.16 | 0.34 | 45 | 0.34          | 0.30 | 0.26  | 38 | 0.345         | -0.07  | -0.18 | 0.04  | 0.22  |
| rs2271293                                               | LCAT            | 0.01   | 0.03 | 0.60    | 394 | -0.04       | 0.08 | 0.64 | 46 | -0.11         | 0.12 | 0.34  | 39 | 0.50          | 0.00   | -0.05 | 0.05  | 0.92  |
| rs328                                                   | LPL             | -0.03  | 0.03 | 0.37    | 391 | -0.21       | 0.10 | 0.04 | 43 | -0.02         | 0.15 | 0.88  | 39 | 0.21          | -0.05  | -0.11 | 0.01  | 0.12  |
| rs4846914                                               | GALNT2          | -0.02  | 0.02 | 0.19    | 390 | -0.10       | 0.05 | 0.04 | 46 | -0.03         | 0.06 | 0.60  | 39 | 0.34          | -0.04  | -0.07 | -0.00 | 0.04  |
| rs2338104                                               | MMAB, MVK       | 0.01   | 0.02 | 0.69    | 389 | 0.01        | 0.06 | 0.87 | 45 | -0.00         | 0.07 | 0.95  | 39 | 0.97          | 0.01   | -0.03 | 0.04  | 0.69  |
| <b>Association of TG SNPs with InTG at baseline</b>     |                 |        |      |         |     |             |      |      |    |               |      |       |    |               |        |       |       |       |
|                                                         | APOA1-C3-A4,    | -0.05  | 0.05 | 0.32    | 391 | -0.31       | 0.14 | 0.03 | 46 | 0.23          | 0.15 | 0.14  | 38 | <b>0.04</b>   |        |       |       |       |

|                                                           |                 |       |      |             |     |       |      |       |    |       |      |      |    |                   |       |       |       |         |
|-----------------------------------------------------------|-----------------|-------|------|-------------|-----|-------|------|-------|----|-------|------|------|----|-------------------|-------|-------|-------|---------|
| rs28927680                                                | ZNF259, BUD13   |       |      |             |     |       |      |       |    |       |      |      |    |                   |       |       |       |         |
| rs7557067                                                 | APOB            | 0.01  | 0.04 | 0.75        | 392 | -0.03 | 0.09 | 0.77  | 46 | -0.04 | 0.09 | 0.68 | 39 | 0.84              | 0.00  | -0.06 | 0.06  | 0.97    |
| rs1260326                                                 | GCKR            | 0.09  | 0.03 | 0.004       | 388 | 0.03  | 0.09 | 0.76  | 45 | -0.06 | 0.09 | 0.51 | 38 | 0.25              | 0.07  | 0.02  | 0.13  | 0.01    |
| rs2954029                                                 | TRIB1           | 0.01  | 0.03 | 0.79        | 389 | 0.05  | 0.09 | 0.60  | 46 | 0.03  | 0.08 | 0.72 | 39 | 0.90              | 0.01  | -0.04 | 0.07  | 0.61    |
| rs17145738                                                | BCL7B, TBL2     | 0.16  | 0.05 | 0.002       | 392 | 0.10  | 0.10 | 0.33  | 45 | 0.26  | 0.11 | 0.02 | 38 | 0.55              | 0.16  | 0.08  | 0.24  | <0.0001 |
| rs328                                                     | LPL             | 0.04  | 0.05 | 0.50        | 390 | 0.50  | 0.15 | 0.002 | 43 | -0.03 | 0.18 | 0.88 | 39 | <b>0.01</b>       |       |       |       |         |
| rs4846914                                                 | GALNT2          | -0.03 | 0.03 | 0.26        | 389 | -0.02 | 0.07 | 0.79  | 46 | -0.04 | 0.07 | 0.56 | 39 | 0.98              | -0.03 | -0.08 | 0.02  | 0.20    |
| rs12272004                                                | APO(A1/A4A5/C3) | 0.06  | 0.05 | 0.25        | 392 | 0.04  | 0.11 | 0.72  | 46 | -0.07 | 0.13 | 0.61 | 39 | 0.67              | 0.04  | -0.05 | 0.13  | 0.34    |
| rs693                                                     | APOB            | 0.04  | 0.03 | 0.12        | 391 | 0.03  | 0.09 | 0.74  | 46 | 0.14  | 0.07 | 0.07 | 39 | 0.51              | 0.06  | 0.01  | 0.11  | 0.03    |
| <b>Association of HDL-C SNPs with apo A-I at baseline</b> |                 |       |      |             |     |       |      |       |    |       |      |      |    |                   |       |       |       |         |
| rs3890182                                                 | ABCA1           | -0.03 | 0.03 | 0.36        | 373 | -0.03 | 0.06 | 0.65  | 45 | 0.06  | 0.10 | 0.54 | 37 | 0.79              | 0.01  | -0.05 | 0.07  | 0.69    |
| rs964184                                                  | APOA1-C3-A4-A5  | 0.00  | 0.03 | 0.85        | 375 | -0.06 | 0.06 | 0.35  | 44 | 0.09  | 0.08 | 0.28 | 36 | 0.42              | -0.05 | -0.10 | 0.001 | 0.65    |
| rs173539                                                  | CETP            | -0.03 | 0.02 | 0.12        | 370 | 0.00  | 0.05 | 0.96  | 46 | -0.02 | 0.06 | 0.70 | 37 | 0.72              | -0.03 | -0.06 | 0.01  | 0.13    |
| rs1800775                                                 | CETP            | -0.03 | 0.02 | 0.11        | 367 | -0.01 | 0.05 | 0.77  | 46 | -0.09 | 0.06 | 0.18 | 37 | 0.59              | -0.04 | -0.07 | 0.001 | 0.05    |
| rs9989419                                                 | CETP            | -0.03 | 0.02 | 0.09        | 372 | -0.07 | 0.05 | 0.10  | 45 | -0.04 | 0.05 | 0.48 | 35 | 0.14              | -0.05 | -0.08 | -0.01 | 0.01    |
| rs10468017                                                | LIPC            | -0.05 | 0.02 | 0.02        | 366 | -0.06 | 0.05 | 0.29  | 46 | 0.06  | 0.07 | 0.36 | 37 | 0.99              | -0.07 | -0.11 | -0.03 | 0.001   |
| rs1800588                                                 | LIPC            | -0.03 | 0.02 | 0.21        | 373 | -0.03 | 0.05 | 0.48  | 46 | 0.13  | 0.06 | 0.04 | 37 | <b>&lt;0.0001</b> |       |       |       |         |
| rs4939883                                                 | LIPG            | -0.01 | 0.02 | 0.78        | 374 | 0.00  | 0.06 | 0.95  | 46 | -0.11 | 0.06 | 0.07 | 37 | 0.38              | -0.02 | -0.06 | 0.03  | 0.49    |
| rs1800961                                                 | HNF4A           | -0.03 | 0.06 | 0.65        | 373 | -0.16 | 0.12 | 0.18  | 45 | 0.06  | 0.26 | 0.81 | 36 | 0.25              | -0.07 | -0.18 | 0.04  | 0.24    |
| rs2271293                                                 | LCAT            | -0.02 | 0.03 | 0.41        | 375 | -0.08 | 0.06 | 0.16  | 46 | -0.06 | 0.10 | 0.57 | 37 | 0.76              | -0.00 | -0.06 | 0.05  | 0.89    |
| rs328                                                     | LPL             | -0.05 | 0.03 | 0.10        | 372 | 0.02  | 0.08 | 0.81  | 43 | -0.05 | 0.13 | 0.73 | 37 | 0.36              | -0.07 | -0.13 | -0.01 | 0.03    |
| rs4846914                                                 | GALNT2          | 0.00  | 0.02 | 0.80        | 372 | -0.07 | 0.04 | 0.10  | 46 | -0.12 | 0.05 | 0.01 | 37 | 0.36              | -0.04 | -0.07 | 0.00  | 0.04    |
| rs2338104                                                 | MMAB, MVK       | -0.01 | 0.02 | 0.59        | 370 | -0.02 | 0.04 | 0.63  | 45 | 0.08  | 0.06 | 0.22 | 37 | 0.93              | 0.01  | -0.02 | 0.05  | 0.43    |
| <b>Association of LDL-C SNPs with apo B at baseline</b>   |                 |       |      |             |     |       |      |       |    |       |      |      |    |                   |       |       |       |         |
| rs6544713                                                 | ABCG8           | 0.01  | 0.02 | 0.84        | 375 | 0.06  | 0.08 | 0.43  | 46 | -0.01 | 0.07 | 0.92 | 37 | 0.77              | 0.01  | -0.04 | 0.05  | 0.71    |
| rs6756629                                                 | ABCG5           | 0.08  | 0.04 | 0.08        | 374 | 0.07  | 0.16 | 0.64  | 46 | 0.05  | 0.14 | 0.73 | 37 | 0.98              | 0.07  | -0.01 | 0.15  | 0.07    |
| rs4420638                                                 | APOE            | 0.07  | 0.03 | <b>0.01</b> | 368 | 0.11  | 0.07 | 0.13  | 46 | 0.02  | 0.09 | 0.82 | 37 | 0.73              | 0.07  | 0.02  | 0.12  | 0.006   |
| rs12272004                                                | APO(A1/A4A5/C3) | -0.01 | 0.04 | 0.80        | 374 | 0.04  | 0.08 | 0.66  | 46 | -0.04 | 0.10 | 0.66 | 37 | 0.82              | -0.01 | -0.07 | 0.06  | 0.85    |
| rs6589566                                                 | APOA5           | 0.06  | 0.05 | 0.22        | 367 | -0.06 | 0.11 | 0.58  | 46 | -0.01 | 0.12 | 0.94 | 37 | 0.58              | 0.03  | -0.05 | 0.11  | 0.40    |
| rs515135                                                  | APOB            | 0.01  | 0.03 | 0.64        | 373 | 0.03  | 0.08 | 0.69  | 45 | 0.12  | 0.08 | 0.13 | 37 | 0.42              | 0.03  | -0.02 | 0.07  | 0.30    |
| rs693                                                     | APOB            | 0.00  | 0.02 | 0.91        | 374 | 0.07  | 0.07 | 0.28  | 46 | 0.04  | 0.06 | 0.49 | 37 | 0.54              | 0.01  | -0.03 | 0.05  | 0.52    |
| rs780094                                                  | GCKR            | 0.05  | 0.02 | <b>0.02</b> | 374 | 0.03  | 0.07 | 0.62  | 46 | 0.01  | 0.07 | 0.94 | 35 | 0.81              | 0.05  | 0.01  | 0.09  | 0.02    |
| rs3846662                                                 | HMGCR           | 0.03  | 0.02 | 0.21        | 363 | -0.09 | 0.07 | 0.19  | 41 | -0.08 | 0.05 | 0.16 | 35 | 0.07              | 0.00  | -0.03 | 0.04  | 0.83    |
| rs6511720                                                 | LDLR            | 0.02  | 0.03 | 0.53        | 373 | 0.09  | 0.09 | 0.34  | 46 | -0.02 | 0.10 | 0.86 | 37 | 0.72              | 0.03  | -0.04 | 0.08  | 0.42    |
| rs11591147                                                | PCSK9           | -0.04 | 0.11 | 0.73        | 375 | 0.21  | 0.13 | 0.10  | 46 | 0.11  | 0.15 | 0.45 | 37 | 0.33              | 0.08  | -0.06 | 0.23  | 0.27    |
| rs1501908                                                 | TIMD4, HAVCR1   | -0.01 | 0.02 | 0.61        | 371 | -0.03 | 0.06 | 0.62  | 45 | 0.01  | 0.05 | 0.80 | 36 | 0.68              | -0.01 | -0.04 | 0.03  | 0.61    |

Data are the co-efficients of associations of SNP with the trait at baseline presented as effect size, standard error and P derived from linear regression models. The linear regression models were of SNP against trait at baseline adjusted for age, gender and BMI. Data are presented for each ethnic sub-group. The summary statistics were meta-analysed and the effect size (95% CI), P and heterogeneity are shown, unless there was significant heterogeneity between ethnicities (P<0.05 for the test of heterogeneity). Triglyceride data was logged for analysis and is presented in that form. The number of participants (n) in each subgroup is indicated.
