# Supplementary material for: Genetic predisposition influences plasma lipids of participants on habitual diet, but not the response to reductions in dietary intake of saturated fatty acids
Source: PubMed Central journal article supplement (PMC3407860; doi:10.1016/j.atherosclerosis.2010.12.039), 2011-04
Supplement: mmc5.pdf [file mmc5.pdf]

Supplementary Table 3

Association between individual risk SNPs and the change in total, LDL and HDL cholesterol, triglycerides, apo A-I and apo B in response to 24 weeks dietary intervention on a reference, low fat or high mono-unsaturated fat diet

|                                                       | Gene            | White  |      |             |     | S, SE Asian |      |      |    | Black-African |      |      |    | Meta-analysis |        |       |      |      |
|-------------------------------------------------------|-----------------|--------|------|-------------|-----|-------------|------|------|----|---------------|------|------|----|---------------|--------|-------|------|------|
|                                                       |                 | Effect | SE   | P           | n   | Effect      | SE   | P    | n  | Effect        | SE   | P    | n  | Heterogeneity | Effect | CI    | CI   | P    |
| <b>Association of TC SNPs with change in TC</b>       |                 |        |      |             |     |             |      |      |    |               |      |      |    |               |        |       |      |      |
| rs4939883                                             | LIPG            | 0.01   | 0.05 | 0.89        | 369 | -0.02       | 0.14 | 0.86 | 46 | 0.02          | 0.14 | 0.86 | 38 | 0.96          | 0.01   | -0.08 | 0.09 | 0.90 |
| rs6756629                                             | ABCG5           | -0.08  | 0.08 | 0.31        | 369 | 0.33        | 0.27 | 0.24 | 46 | 0.29          | 0.31 | 0.36 | 38 | 0.20          | -0.03  | -0.18 | 0.12 | 0.69 |
| rs12272004                                            | APO(A1/A4A5/C3) | -0.04  | 0.07 | 0.54        | 369 | 0.02        | 0.15 | 0.91 | 46 | -0.01         | 0.22 | 0.98 | 38 | 0.93          | -0.03  | -0.15 | 0.09 | 0.62 |
| rs693                                                 | APOB            | -0.03  | 0.04 | 0.43        | 369 | -0.19       | 0.12 | 0.13 | 46 | -0.26         | 0.11 | 0.03 | 38 | 0.09          | -0.07  | -0.14 | 0.00 | 0.06 |
| rs3846662                                             | HMGR            | -0.01  | 0.04 | 0.75        | 358 | 0.16        | 0.11 | 0.17 | 41 | -0.31         | 0.15 | 0.04 | 36 | <b>0.04</b>   |        |       |      |      |
| <b>Association of LDL-C SNPs with change in LDL-C</b> |                 |        |      |             |     |             |      |      |    |               |      |      |    |               |        |       |      |      |
| rs6544713                                             | ABCG8           | -0.02  | 0.04 | 0.69        | 368 | 0.13        | 0.12 | 0.30 | 46 | 0.07          | 0.15 | 0.62 | 38 | 0.46          | 0.00   | -0.07 | 0.07 | 0.95 |
| rs6756629                                             | ABCG5           | -0.04  | 0.07 | 0.60        | 367 | 0.29        | 0.23 | 0.22 | 46 | 0.09          | 0.28 | 0.76 | 38 | 0.38          | -0.01  | -0.13 | 0.12 | 0.94 |
| rs4420638                                             | APOE            | -0.03  | 0.05 | 0.54        | 361 | 0.01        | 0.11 | 0.90 | 46 | -0.03         | 0.18 | 0.88 | 38 | 0.94          | -0.02  | -0.10 | 0.06 | 0.59 |
| rs12272004                                            | APO(A1/A4A5/C3) | 0.01   | 0.06 | 0.89        | 367 | 0.01        | 0.13 | 0.91 | 46 | 0.11          | 0.19 | 0.59 | 38 | 0.89          | 0.02   | -0.08 | 0.12 | 0.76 |
| rs6589566                                             | APOA5           | -0.05  | 0.07 | 0.45        | 360 | 0.19        | 0.17 | 0.25 | 46 | 0.30          | 0.24 | 0.21 | 38 | 0.17          | 0.01   | -0.12 | 0.13 | 0.93 |
| rs515135                                              | APOB            | 0.00   | 0.04 | 0.90        | 366 | 0.12        | 0.13 | 0.34 | 45 | -0.05         | 0.16 | 0.75 | 38 | 0.62          | 0.01   | -0.06 | 0.09 | 0.75 |
| rs693                                                 | APOB            | -0.01  | 0.03 | 0.83        | 367 | -0.13       | 0.10 | 0.22 | 46 | -0.20         | 0.10 | 0.07 | 38 | 0.14          | -0.03  | -0.09 | 0.03 | 0.27 |
| rs780094                                              | GCKR            | -0.03  | 0.03 | 0.42        | 367 | -0.12       | 0.10 | 0.24 | 46 | 0.16          | 0.13 | 0.23 | 36 | 0.23          | -0.03  | -0.09 | 0.04 | 0.42 |
| rs3846662                                             | HMGR            | 0.02   | 0.03 | 0.59        | 356 | 0.09        | 0.09 | 0.33 | 41 | -0.14         | 0.13 | 0.32 | 36 | 0.38          | 0.02   | -0.04 | 0.08 | 0.55 |
| rs6511720                                             | LDLR            | 0.05   | 0.05 | 0.37        | 366 | -0.23       | 0.14 | 0.11 | 46 | 0.28          | 0.16 | 0.10 | 38 | <b>0.05</b>   |        |       |      |      |
| rs11591147                                            | PCSK9           | 0.13   | 0.17 | 0.45        | 368 | 0.34        | 0.19 | 0.09 | 46 | 0.37          | 0.31 | 0.24 | 38 | 0.66          | 0.25   | 0.01  | 0.48 | 0.04 |
| rs1501908                                             | TIMD4, HAVCR1   | -0.05  | 0.03 | 0.14        | 364 | 0.04        | 0.10 | 0.69 | 45 | -0.11         | 0.12 | 0.37 | 37 | 0.58          | -0.04  | -0.10 | 0.02 | 0.15 |
| <b>Association of HDL-C SNPs with change in HDL-C</b> |                 |        |      |             |     |             |      |      |    |               |      |      |    |               |        |       |      |      |
| rs3890182                                             | ABCA1           | -0.02  | 0.02 | 0.29        | 368 | -0.02       | 0.06 | 0.75 | 45 | 0.02          | 0.05 | 0.72 | 38 | 0.76          | -0.02  | -0.05 | 0.02 | 0.36 |
| rs964184                                              | APOA1-C3-A4-A5  | -0.02  | 0.02 | 0.17        | 370 | 0.02        | 0.05 | 0.65 | 44 | -0.04         | 0.04 | 0.39 | 37 | 0.64          | -0.02  | -0.05 | 0.01 | 0.16 |
| rs173539                                              | CETP            | 0.00   | 0.01 | 0.87        | 365 | -0.02       | 0.04 | 0.56 | 46 | 0.02          | 0.03 | 0.49 | 38 | 0.65          | -0.00  | -0.02 | 0.02 | 0.95 |
| rs1800775                                             | CETP            | 0.00   | 0.01 | 0.72        | 363 | -0.01       | 0.04 | 0.81 | 46 | -0.03         | 0.03 | 0.46 | 38 | 0.84          | -0.01  | -0.03 | 0.02 | 0.52 |
| rs9989419                                             | CETP            | 0.00   | 0.01 | 0.97        | 367 | 0.04        | 0.04 | 0.35 | 45 | 0.02          | 0.03 | 0.57 | 36 | 0.60          | 0.01   | -0.02 | 0.03 | 0.64 |
| rs10468017                                            | LIPC            | 0.00   | 0.01 | 0.92        | 361 | -0.08       | 0.04 | 0.06 | 46 | -0.07         | 0.04 | 0.10 | 38 | 0.07          | -0.02  | -0.04 | 0.01 | 0.19 |
| rs1800588                                             | LIPC            | -0.03  | 0.01 | 0.08        | 368 | 0.04        | 0.04 | 0.37 | 46 | 0.01          | 0.04 | 0.76 | 38 | 0.26          | -0.02  | -0.04 | 0.01 | 0.25 |
| rs4939883                                             | LIPG            | 0.00   | 0.02 | 0.98        | 369 | -0.03       | 0.05 | 0.47 | 46 | -0.03         | 0.03 | 0.40 | 38 | 0.64          | -0.01  | -0.03 | 0.02 | 0.55 |
| rs1800961                                             | HNF4A           | -0.04  | 0.04 | 0.31        | 368 | 0.04        | 0.11 | 0.73 | 45 | 0.08          | 0.14 | 0.55 | 37 | 0.58          | -0.02  | -0.09 | 0.05 | 0.52 |
| rs2271293                                             | LCAT            | 0.00   | 0.02 | 0.94        | 370 | 0.02        | 0.05 | 0.71 | 46 | -0.04         | 0.05 | 0.42 | 38 | 0.67          | -0.00  | -0.03 | 0.03 | 0.95 |
| rs328                                                 | LPL             | -0.01  | 0.02 | 0.54        | 367 | -0.03       | 0.08 | 0.68 | 43 | 0.09          | 0.06 | 0.16 | 38 | 0.27          | -0.00  | -0.04 | 0.03 | 0.84 |
| rs4846914                                             | GALNT2          | 0.03   | 0.01 | <b>0.03</b> | 367 | 0.01        | 0.03 | 0.77 | 46 | -0.02         | 0.03 | 0.35 | 38 | 0.19          | 0.02   | -0.00 | 0.04 | 0.11 |
| rs2338104                                             | MMAB, MVK       | -0.02  | 0.01 | 0.18        | 365 | -0.02       | 0.04 | 0.51 | 45 | 0.01          | 0.03 | 0.74 | 38 | 0.69          | -0.01  | -0.03 | 0.01 | 0.20 |

| <b>Association of TG SNPs with change in TG</b>         |                               |       |      |      |     |       |      |      |    |       |      |      |    |             |       |       |      |      |
|---------------------------------------------------------|-------------------------------|-------|------|------|-----|-------|------|------|----|-------|------|------|----|-------------|-------|-------|------|------|
| rs28927680                                              | APOA1-C3-A4,<br>ZNF259, BUD13 | 0.05  | 0.06 | 0.40 | 368 | -0.05 | 0.15 | 0.76 | 46 | 0.19  | 0.20 | 0.35 | 37 | 0.64        | 0.05  | -0.06 | 0.16 | 0.37 |
| rs7557067                                               | APOB                          | 0.00  | 0.04 | 0.94 | 368 | -0.05 | 0.09 | 0.58 | 46 | 0.07  | 0.11 | 0.54 | 38 | 0.71        | 0.00  | -0.07 | 0.07 | 0.93 |
| rs1260326                                               | GCKR                          | 0.05  | 0.04 | 0.15 | 364 | 0.01  | 0.09 | 0.95 | 45 | 0.04  | 0.12 | 0.74 | 37 | 0.88        | 0.05  | -0.02 | 0.11 | 0.16 |
| rs2954029                                               | TRIB1                         | -0.01 | 0.04 | 0.79 | 365 | 0.09  | 0.09 | 0.31 | 46 | -0.04 | 0.11 | 0.71 | 38 | 0.53        | 0.00  | -0.06 | 0.06 | 0.98 |
| rs17145738                                              | BCL7B, TBL2                   | -0.02 | 0.06 | 0.76 | 368 | -0.03 | 0.11 | 0.80 | 45 | 0.12  | 0.17 | 0.49 | 37 | 0.74        | -0.01 | -0.10 | 0.09 | 0.86 |
| rs328                                                   | LPL                           | -0.04 | 0.06 | 0.54 | 366 | 0.09  | 0.19 | 0.64 | 43 | -0.01 | 0.23 | 0.96 | 38 | 0.82        | -0.03 | -0.13 | 0.08 | 0.65 |
| rs4846914                                               | GALNT2                        | 0.00  | 0.03 | 0.93 | 366 | -0.04 | 0.07 | 0.57 | 46 | 0.02  | 0.09 | 0.83 | 38 | 0.85        | -0.01 | -0.07 | 0.05 | 0.80 |
| rs12272004                                              | APO(A1/A4A5/C3)               | -0.04 | 0.06 | 0.48 | 368 | 0.06  | 0.11 | 0.58 | 46 | -0.28 | 0.16 | 0.09 | 38 | 0.21        | -0.05 | -0.14 | 0.05 | 0.37 |
| rs693                                                   | APOB                          | 0.00  | 0.03 | 0.93 | 368 | -0.14 | 0.09 | 0.13 | 46 | -0.18 | 0.09 | 0.07 | 38 | 0.11        | -0.04 | -0.10 | 0.02 | 0.23 |
| <b>Association of HDL-C SNPs with change in apo A-I</b> |                               |       |      |      |     |       |      |      |    |       |      |      |    |             |       |       |      |      |
| rs3890182                                               | ABCA1                         | -0.01 | 0.02 | 0.46 | 373 | -0.01 | 0.05 | 0.88 | 45 | -0.14 | 0.07 | 0.04 | 37 | 0.19        | -0.02 | -0.05 | 0.01 | 0.22 |
| rs964184                                                | APOA1-C3-A4-A5                | -0.03 | 0.02 | 0.05 | 375 | 0.06  | 0.04 | 0.12 | 44 | 0.02  | 0.07 | 0.82 | 36 | 0.08        | -0.02 | -0.05 | 0.01 | 0.29 |
| rs173539                                                | CETP                          | -0.02 | 0.01 | 0.11 | 370 | -0.03 | 0.03 | 0.34 | 46 | 0.05  | 0.05 | 0.32 | 37 | 0.34        | -0.02 | -0.04 | 0.01 | 0.13 |
| rs1800775                                               | CETP                          | -0.01 | 0.01 | 0.25 | 367 | 0.04  | 0.03 | 0.20 | 46 | -0.07 | 0.05 | 0.19 | 37 | 0.14        | -0.01 | -0.03 | 0.01 | 0.35 |
| rs9989419                                               | CETP                          | -0.01 | 0.01 | 0.29 | 372 | 0.03  | 0.03 | 0.31 | 45 | 0.04  | 0.05 | 0.44 | 35 | 0.26        | 0.00  | -0.03 | 0.02 | 0.70 |
| rs10468017                                              | LIPC                          | 0.01  | 0.01 | 0.70 | 366 | -0.03 | 0.04 | 0.38 | 46 | -0.09 | 0.05 | 0.10 | 37 | 0.15        | 0.00  | -0.03 | 0.02 | 0.73 |
| rs1800588                                               | LIPC                          | -0.02 | 0.01 | 0.19 | 373 | -0.03 | 0.03 | 0.36 | 46 | 0.05  | 0.05 | 0.34 | 37 | 0.41        | -0.02 | -0.04 | 0.01 | 0.19 |
| rs4939883                                               | LIPG                          | 0.01  | 0.01 | 0.71 | 374 | 0.04  | 0.04 | 0.32 | 46 | 0.10  | 0.05 | 0.05 | 37 | 0.15        | 0.02  | -0.01 | 0.04 | 0.21 |
| rs1800961                                               | HNF4A                         | -0.04 | 0.04 | 0.31 | 373 | 0.03  | 0.09 | 0.75 | 46 | -0.06 | 0.21 | 0.80 | 36 | 0.78        | -0.03 | -0.09 | 0.04 | 0.40 |
| rs2271293                                               | LCAT                          | 0.00  | 0.02 | 0.79 | 375 | 0.08  | 0.04 | 0.05 | 46 | -0.13 | 0.08 | 0.09 | 37 | <b>0.03</b> |       |       |      |      |
| rs328                                                   | LPL                           | 0.00  | 0.02 | 0.83 | 372 | -0.07 | 0.06 | 0.23 | 45 | -0.07 | 0.10 | 0.49 | 37 | 0.47        | -0.01 | -0.05 | 0.02 | 0.48 |
| rs4846914                                               | GALNT2                        | -0.01 | 0.01 | 0.59 | 372 | 0.03  | 0.03 | 0.25 | 46 | -0.01 | 0.05 | 0.90 | 37 | 0.44        | 0.00  | -0.02 | 0.02 | 0.95 |
| rs2338104                                               | MMAB, MVK                     | -0.01 | 0.01 | 0.47 | 370 | -0.03 | 0.03 | 0.26 | 45 | -0.01 | 0.05 | 0.90 | 37 | 0.73        | -0.01 | -0.03 | 0.01 | 0.27 |
| <b>Association of LDL-C SNPs with change in apo B</b>   |                               |       |      |      |     |       |      |      |    |       |      |      |    |             |       |       |      |      |
| rs6544713                                               | ABCG8                         | -0.01 | 0.01 | 0.62 | 375 | -0.05 | 0.05 | 0.30 | 46 | 0.10  | 0.05 | 0.04 | 37 | <b>0.05</b> |       |       |      |      |
| rs6756629                                               | ABCG5                         | -0.01 | 0.03 | 0.74 | 374 | -0.06 | 0.09 | 0.54 | 46 | 0.13  | 0.09 | 0.15 | 37 | 0.25        | 0.00  | -0.05 | 0.05 | 0.95 |
| rs4420638                                               | APOE                          | 0.00  | 0.02 | 0.83 | 368 | -0.05 | 0.05 | 0.33 | 46 | 0.07  | 0.06 | 0.22 | 37 | 0.28        | 0.00  | -0.03 | 0.03 | 0.85 |
| rs12272004                                              | APO(A1/A4A5/C3)               | -0.03 | 0.02 | 0.14 | 374 | 0.07  | 0.05 | 0.14 | 46 | 0.08  | 0.06 | 0.21 | 37 | <b>0.05</b> |       |       |      |      |
| rs6589566                                               | APOA5                         | 0.00  | 0.03 | 0.86 | 367 | 0.05  | 0.07 | 0.48 | 46 | -0.02 | 0.08 | 0.77 | 37 | 0.72        | 0.00  | -0.05 | 0.05 | 0.99 |
| rs515135                                                | APOB                          | 0.01  | 0.02 | 0.53 | 373 | -0.02 | 0.05 | 0.70 | 45 | 0.00  | 0.06 | 0.96 | 37 | 0.84        | 0.01  | -0.02 | 0.03 | 0.64 |
| rs693                                                   | APOB                          | 0.00  | 0.01 | 0.92 | 374 | -0.03 | 0.04 | 0.44 | 46 | -0.06 | 0.04 | 0.13 | 37 | 0.29        | -0.01 | -0.03 | 0.01 | 0.44 |
| rs780094                                                | GCKR                          | 0.00  | 0.01 | 0.89 | 374 | -0.02 | 0.04 | 0.61 | 46 | 0.09  | 0.04 | 0.04 | 35 | 0.09        | 0.00  | -0.02 | 0.03 | 0.73 |
| rs3846662                                               | HMGCR                         | 0.00  | 0.01 | 0.78 | 363 | 0.02  | 0.05 | 0.73 | 41 | 0.04  | 0.05 | 0.47 | 35 | 0.69        | 0.00  | -0.02 | 0.02 | 0.99 |
| rs6511720                                               | LDLR                          | 0.00  | 0.02 | 0.88 | 373 | 0.08  | 0.06 | 0.16 | 46 | -0.12 | 0.07 | 0.08 | 37 | 0.07        | 0.00  | -0.03 | 0.04 | 0.87 |
| rs11591147                                              | PCSK9                         | 0.08  | 0.07 | 0.21 | 375 | 0.03  | 0.08 | 0.76 | 46 | -0.03 | 0.10 | 0.80 | 37 | 0.64        | 0.04  | -0.05 | 0.13 | 0.36 |
| rs1501908                                               | TIMD4, HAVCR1                 | -0.02 | 0.01 | 0.10 | 371 | 0.02  | 0.04 | 0.58 | 45 | -0.04 | 0.04 | 0.31 | 36 | 0.47        | -0.02 | -0.04 | 0.00 | 0.10 |

Data are the co-efficients of associations of SNP with the change in trait (final value-baseline value) presented as effect size, standard error and P derived from linear regression models. The linear regression models were of SNP against change in trait adjusted for age, gender BMI and MUFA or LF diet. Data are presented for each ethnic sub-group. The summary statistics were meta-analysed and the effect size (95% CI), P and heterogeneity are shown, unless there

was significant heterogeneity between ethnicities ( $P < 0.05$  for the test of heterogeneity). Negative values represent an association with a reduction in trait following 24 weeks intervention. The number of participants (n) in each subgroup is indicated.
